# Supplementary material for: An intelligent anomaly detection system for IoT using a hybrid metaheuristic evolutionary strategy
Source: PeerJ journal article supplement (doi:10.7717/peerj-cs.3334), 2025-12-05
Supplement: README.docx [file README.docx]

#1. The shared notebook is in ipnyb format. It is compatible with colab, jupyter notebook or anaconda.

#2.Install the Pymetaheuristic library. The second cell command print logits, outputs and score. In ML, logits are the raw, unnormalized predictions from a model before applying something like softmax. So if they're printing logits, those are probably the model's final layer outputs without any activation.

#3.Then, outputs. That's a bit vague. Could be the model's outputs after applying softmax or another activation function. For example, in classification, outputs might be probabilities after softmax. Score could refer to the probability of a particular class. For instance, if they're doing a binary classification, the score might be the softmax of the positive class.

#4.The next cell install a Python library datasets. it consists of updated and freely available data sets.

#5.Another cell in the order is the actual coding of metaheuristic algorithm. 4 libraries are required to be imported namely numpy, math, random and os libraries. There are a total of five target functions in this evolutionary algorithm.

#6.Plotting a single function exactly simulate the scenario of how a whale encircle and catch his prey. the strategy of a whale to catch his prey is purely evolutionary in spirit and it is gradually improved after each run or after each successful hunt.

#7.The KDD cup dataset is explored with a total of 42 attributes and 494020 records. The Binary classification or search consist of two classes namely normal and attack.

#8.The following steps are taking place

#9.Standardize the features, split the train and test datasets, objective function definition and WOA parametrization. There are a total of six parameters in WOA. They can be altered for better detection or prediction of IDS. There is no fix criteria of hyper-tunning. It is purely dependent on a specific dataset.

#10.A standard WOA Algorithm consist of objective function and parameters.

#11.The binary classification

#12.Train and test distribution of the dataset.

#13.Define the objective function of the Genetic algorithm. It is also called the fitness function. Random classifier is used for the selection of the fittest.

#14.A total of six parameters namely hunting party, minimum and maximum values. It also consist of iterations , spiral parameters and verbose. Reduce the number of iterations for CPU. With the count rise in the hunting party also increase the ratio of hunt.

#15.Woa delimiter is assigned to the whale optimization algorithm.

#16.In the plot parameter projected 3D view and the notebook display are available.

#17.Best hyperparameter is defined.

#18.Pyplot visualization with classes and data point per class

#19. The solution of objective function. Swar size and no of iteration are important in the identification of intruder.

#20. Logistic regressor and classifier were tested on the same dataset.

#21.RF classifier is hyperdizeb with woa. The hyperparameter of woa is used as a parameter of random forest classifier.
